# Supplementary material for: Highly Specific Polyphenolic Colloids as Alternatives to Antimicrobials in Livestock Productions
Source: Preprints.org preprint supplement (doi:10.20944/preprints202408.0055.v1), 2024-08-01
Supplement: Supplementary file 1 [file supplementary]

**Highly specific polyphenolic colloids as alternatives to antimicrobials in livestock productions**

Andrea Laconi 1, Alessandro Cecconello 1, Simone Molinari 2, Graziano Rilievo 1, Aura Cencini 1, Federica Tonolo 1, Antonie Krystofova 1, Hardick Nilesh Majethia 1, Roberta Tolosi 1, Eliana Schiavon 3, Carlo Nicoletto 4, Alessandra Piccirillo 1, Fabio Vianello 1, and Massimiliano Magro 1,*

1Department of Comparative Biomedicine and Food Science, University of Padua, Viale dell’Università 16, 35020, Legnaro (PD), Italy

2Department of Geosciences and CIRCe Centre, University of Padua, via G. Gradenigo 6, 35129, Padua, Italy

3Istituto Zooprofilattico Sperimentale delle Venezie, Viale dell’Università, 10, Padova, Legnaro, 35020, Italy

4Department of Agronomy, Food, Natural Resources, Animals and Environment, University of Padua, Viale dell’Università 16, 35020, Legnaro (PD), Italy

**Supplementary Information**

Corresponding author: Prof. Massimiliano Magro - Department of Comparative Biomedicine and Food Science, University of Padova, Agripolis, Viale dell’Università 16, 35020 Legnaro, Padua, Italy

Telephone: +39-049-8272916

Email: [massimiliano.magro@unipd.it](mailto:massimiliano.magro@unipd.it)



**Figure S1**. Folin–Ciocalteâu calibration curve built by plotting the UV-vis absorbance at 750 nm of the assay reaction product against gallic acid in the concentration range: 0 to 37.5 mg L-1.

|  | | |  |  |
| --- | --- | --- | --- | --- |
| **Host** | **Bacteria** | **Disease** | **Gram +/-** | **log cfu/mL** |
| Bovine | *Pasteurella multocida* | Polmonitis | neg | 7.94 |
| *Staphylococcus aureus* | Mastitis | pos | 8.09 |
| *Mannehimia haemolitica* | Polmonitis | neg | 7.59 |
| Swine | *Streptococcus suis* | N.D. | pos | 5.88 |
| Chicken | Avian Pathogenic *Escherichia coli* | Colibacillosis | neg | 11.06 |
| *Salmonella* Typhimurium | N.D. | neg | 7.76 |
| **Table S1.** List of bacterial strains included in the study. | | |
